# Supplementary material
Source: Research Square preprint supplement (doi:10.21203/rs.3.rs-8338814/v1)
Supplement: Supplementary file 1 [file 6fe6f0d8d86478d8c5d9d7c7.xlsx]

## Sheet: Total
Sample ID	Species	Sex	Age	Cadmium	Lead	Arsenic
1	Clarias gariepinus	F	young	0	0	0
2	Clarias gariepinus	F	young	0	0	0
3	Clarias gariepinus	F	young	0	0	0
3	Clarias gariepinus	F	young	0	0	0.12
4	Clarias gariepinus	F	young	0	0	0
5	Clarias gariepinus	F	young	0	0	0
6	Clarias gariepinus	F	young	0	0	0
7	Clarias gariepinus	F	young	0	0	0
8	Clarias gariepinus	F	young	0	0	0
9	Clarias gariepinus	F	young	0	0	0.07
10	Clarias gariepinus	F	young	0	0	0
11	Clarias gariepinus	F	young	0	0	0
12	Clarias gariepinus	F	young	0	0	0
13	Synodontis membra	F	young	0	0	0
14	Synodontis membra	F	young	0	0	0.22
15	Synodontis membra	F	young	0	0	0
16	Synodontis membra	F	young	0	0	0.16
17	Synodontis membra	F	young	0	0	0
18	Synodontis membra	M	young	0	0	0.07
19	Synodontis membra	M	young	0	0	0
20	Synodontis membra	M	young	0	0	0.02
21	Synodontis membra	M	young	0	0	0
22	Synodontis membra	M	young	0	0	0
23	Clarias gariepinus	M	young	0	0	0.02
24	Clarias gariepinus	M	young	0	0	0.02
25	Clarias gariepinus	M	young	0	0	0
26	Clarias gariepinus	M	young	0	0	0
27	Clarias gariepinus	M	young	0	0	0
28	Clarias gariepinus	M	young	0	0	0.07
29	Clarias gariepinus	M	young	0	0	0
30	Clarias gariepinus	M	young	0	0	0
31	Clarias gariepinus	M	young	0	0	0.07
32	Clarias gariepinus	M	young	0	0	0.07
33	Clarias gariepinus	M	young	0	0	0.07
34	Clarias gariepinus	M	young	0	0	0
35	Clarias gariepinus	M	young	0	0	0
36	Clarias gariepinus	M	young	0	0	0.07
37	lates niloticus	M	young	0	0	0.07
38	lates niloticus	M	young	0	0	0.012
39	lates niloticus	M	young	0	0	0.07
40	lates niloticus	M	young	0	0	0.07
41	lates niloticus	M	young	0	0	0
42	lates niloticus	M	young	0	0	0.16
43	lates niloticus	M	young	0	0	0.02
44	lates niloticus	F	young	0	0	0.07
45	lates niloticus	F	young	0	0	0
46	lates niloticus	F	young	0	0	0
47	lates niloticus	F	young	0	0	0
48	lates niloticus	F	young	0	0	0.02
49	lates niloticus	F	young	0	0	0
50	lates niloticus	F	young	0	0	0
51	oreochromics nilotic	F	young	0	0	0.21
52	oreochromics nilotic	F	young	0	0	0.16
53	oreochromics nilotic	F	young	0	0	0.02
54	oreochromics nilotic	F	young	0	0	0.02
55	oreochromics nilotic	F	young	0	0	0
56	oreochromics nilotic	F	young	0	0	0.12
57	oreochromics nilotic	F	young	0	0	0
58	oreochromics nilotic	F	young	0	0	0
59	oreochromics nilotic	F	young	0	0	0.02
60	oreochromics nilotic	F	young	0	0	0.02
61	oreochromics nilotic	M	young	0	0	0
62	oreochromics nilotic	M	young	0	0	0
63	oreochromics nilotic	M	young	0	0	0.02
64	oreochromics nilotic	M	young	0	0	0.02
65	oreochromics nilotic	M	young	0	0	0.02
66	oreochromics nilotic	M	young	0	0	0.02
67	oreochromics nilotic	M	young	0	0	0
68	oreochromics nilotic	M	young	0	0	0.02
69	oreochromics nilotic	M	young	0	0	0.02
70	oreochromics nilotic	M	young	0	0	0.02
71	Clarias gariepinus	F	Adult	0	0	0.07
72	Clarias gariepinus	F	Adult	0	0	0
73	Clarias gariepinus	F	Adult	0	0	0
74	Clarias gariepinus	F	Adult	0	0	0
75	Clarias gariepinus	F	Adult	0	0	0
76	Clarias gariepinus	F	Adult	0	0	0
77	Clarias gariepinus	F	Adult	0	0	0
78	Clarias gariepinus	F	Adult	0	0	0
79	Clarias gariepinus	F	Adult	0	0	0.02
80	Clarias gariepinus	F	Adult	0	0	0
81	Clarias gariepinus	F	Adult	0	0	0
82	Clarias gariepinus	F	Adult	0	0	0
83	Clarias gariepinus	F	Adult	0	0	0
84	Clarias gariepinus	F	Adult	0	0	0
85	Clarias gariepinus	F	Adult	0	0	0
86	Clarias gariepinus	F	Adult	0	0	0.12
87	Clarias gariepinus	F	Adult	0	0	0
88	Clarias gariepinus	F	Adult	0	0	0
89	Clarias gariepinus	F	Adult	0	0	0.07
90	Clarias gariepinus	F	Adult	0	0	0
91	Clarias gariepinus	F	Adult	0	0	0
92	Clarias gariepinus	F	Adult	0	0	0.02
93	Clarias gariepinus	F	Adult	0	0	0
94	Clarias gariepinus	F	Adult	0	0	0
95	Clarias gariepinus	F	Adult	0	0	0
96	Synodontis membra	F	Adult	0	0	0
97	Synodontis membra	F	Adult	0	0	0
98	Synodontis membra	F	Adult	0	0	0
99	Synodontis membra	F	Adult	0	0	0
100	Synodontis membra	F	Adult	0	0	0
101	Synodontis membra	F	Adult	0	0	0
102	Synodontis membra	F	Adult	0	0	0
103	Synodontis membra	F	Adult	0	0	0
104	Synodontis membra	F	Adult	0	0	0.02
105	Synodontis membra	F	Adult	0	0	0
106	Synodontis membra	M	Adult	0	0.02	0
107	Synodontis membra	M	Adult	0	0	0.02
108	Synodontis membra	M	Adult	0	0	0
109	Synodontis membra	M	Adult	0	0	0
110	Synodontis membra	M	Adult	0	0	0
111	Synodontis membra	M	Adult	0	0	0
112	Synodontis membra	M	Adult	0	0	0
113	Synodontis membra	M	Adult	0	0	0
114	Synodontis membra	M	Adult	0	0	0
115	Synodontis membra	M	Adult	0	0	0
116	Synodontis membra	M	Adult	0	0	0.02
117	Synodontis membra	M	Adult	0	0	0
118	Synodontis membra	M	Adult	0	0	0
119	Synodontis membra	M	Adult	0	0	0.07
120	Synodontis membra	M	Adult	0	0	0
121	Clarias gariepinus	M	Adult	0	0	0.02
122	clarias gariepinus	M	Adult	0	0	0
123	clarias gariepinus	M	Adult	0	0	0
124	clarias gariepinus	M	Adult	0	0	0
125	clarias gariepinus	M	Adult	0	0	0.07
126	clarias gariepinus	M	Adult	0	0	0
127	clarias gariepinus	M	Adult	0	0	0
128	clarias gariepinus	M	Adult	0	0	0.07
129	clarias gariepinus	M	Adult	0	0	0
130	clarias gariepinus	M	Adult	0	0	0.07
131	clarias gariepinus	M	Adult	0	0	0
132	clarias gariepinus	M	Adult	0	0	0
133	clarias gariepinus	M	Adult	0	0	0.07
134	clarias gariepinus	M	Adult	0	0	0.12
135	clarias gariepinus	M	Adult	0	0	0
136	clarias gariepinus	M	Adult	0	0	0
137	Clarias gariepinus	M	Adult	0	0	0
138	Clarias gariepinus	M	Adult	0	0	0.02
139	Clarias gariepinus	M	Adult	0	0	0
140	Clarias gariepinus	M	Adult	0	0	0
141	Clarias gariepinus	M	Adult	0	0	0.16
142	Clarias gariepinus	M	Adult	0	0	0
143	Clarias gariepinus	M	Adult	0	0	0
144	Clarias gariepinus	M	Adult	0	0	0
145	Clarias gariepinus	M	Adult	0	0	0
146	Synodontis membra	F	Adult	0	0	0.12
147	Synodontis membra	F	Adult	0	0	0
148	Synodontis membra	F	Adult	0	0	0.07
149	Synodontis membra	F	Adult	0	0	0
150	Synodontis membra	F	Adult	0	0	0
151	Synodontis membra	F	Adult	0	0	0.02
152	Synodontis membra	F	Adult	0	0	0.12
153	Synodontis membra	F	Adult	0	0	0
154	Synodontis membra	F	Adult	0	0	0
155	Synodontis membra	F	Adult	0	0	0
156	Synodontis membra	M	Adult	0	0	0
157	Synodontis membra	M	Adult	0	0	0
158	Synodontis membra	M	Adult	0	0	0
159	Synodontis membra	M	Adult	0	0	0
160	Synodontis membra	M	Adult	0	0	0.07
161	Synodontis membra	M	Adult	0	0	0
162	Synodontis membra	M	Adult	0	0	0
163	Synodontis membra	M	Adult	0	0	0
164	Synodontis membra	M	Adult	0	0	0
165	Synodontis membra	M	Adult	0	0	0.02
166	Synodontis membra	M	Adult	0	0	0
167	Synodontis membra	M	Adult	0	0.02	0
168	Synodontis membra	M	Adult	0	0	0.07
169	Synodontis membra	M	Adult	0	0	0
170	Synodontis membra	M	Adult	0	0	0
171	oreochromics nilotic	F	Adult	0	0	0
172	oreochromics nilotic	F	Adult	0	0	0.07
173	oreochromics nilotic	F	Adult	0	0	0
174	oreochromics nilotic	F	Adult	0	0	0
175	oreochromics nilotic	F	Adult	0	0	0.02
176	oreochromics nilotic	F	Adult	0	0	0
177	oreochromics nilotic	F	Adult	0	0	0.07
178	oreochromics nilotic	F	Adult	0	0	0
179	oreochromics nilotic	F	Adult	0	0	0.02
180	oreochromics nilotic	F	Adult	0	0	0
181	oreochromics nilotic	M	Adult	0	0	0.07
182	oreochromics nilotic	M	Adult	0	0	0
183	oreochromics nilotic	M	Adult	0	0	0
184	oreochromics nilotic	M	Adult	0	0	0
185	oreochromics nilotic	M	Adult	0	0	0.02
186	oreochromics nilotic	M	Adult	0	0	0
187	oreochromics nilotic	M	Adult	0	0	0
188	oreochromics nilotic	M	Adult	0	0	0
189	oreochromics nilotic	M	Adult	0	0	0.02
190	oreochromics nilotic	M	Adult	0	0	0.07
191	oreochromics nilotic	M	Adult	0	0	0.02
192	oreochromics nilotic	M	Adult	0	0	0.12
193	oreochromics nilotic	M	Adult	0	0	0
194	oreochromics nilotic	M	Adult	0	0	0.02
195	oreochromics nilotic	M	Adult	0	0	0.02
196	oreochromics nilotic	M	Adult	0	0	0
197	oreochromics nilotic	M	Adult	0	0	0
198	oreochromics nilotic	M	Adult	0	0	0
199	oreochromics nilotic	M	Adult	0	0	0
200	oreochromics nilotic	M	Adult	0	0	0.02
				0	0.000199005	0.0215522
				0	0.00199002	0.0411205

## Sheet: clarias
Sample ID	Species	Sex	Age	Cadmium	Lead	Arsenic
1	Clarias gariepinus	F	young	0	0	0
2	Clarias gariepinus	F	young	0	0	0
3	Clarias gariepinus	F	young	0	0	0
3	Clarias gariepinus	F	young	0	0	0.12
4	Clarias gariepinus	F	young	0	0	0
5	Clarias gariepinus	F	young	0	0	0
6	Clarias gariepinus	F	young	0	0	0
7	Clarias gariepinus	F	young	0	0	0
8	Clarias gariepinus	F	young	0	0	0
9	Clarias gariepinus	F	young	0	0	0.07
10	Clarias gariepinus	F	young	0	0	0
11	Clarias gariepinus	F	young	0	0	0
12	Clarias gariepinus	F	young	0	0	0
23	Clarias gariepinus	M	young	0	0	0.02
24	Clarias gariepinus	M	young	0	0	0.02
25	Clarias gariepinus	M	young	0	0	0
26	Clarias gariepinus	M	young	0	0	0
27	Clarias gariepinus	M	young	0	0	0
28	Clarias gariepinus	M	young	0	0	0.07
29	Clarias gariepinus	M	young	0	0	0
30	Clarias gariepinus	M	young	0	0	0
31	Clarias gariepinus	M	young	0	0	0.07
32	Clarias gariepinus	M	young	0	0	0.07
33	Clarias gariepinus	M	young	0	0	0.07
34	Clarias gariepinus	M	young	0	0	0
35	Clarias gariepinus	M	young	0	0	0
36	Clarias gariepinus	M	young	0	0	0.07
71	Clarias gariepinus	F	Adult	0	0	0.07
72	Clarias gariepinus	F	Adult	0	0	0
73	Clarias gariepinus	F	Adult	0	0	0
74	Clarias gariepinus	F	Adult	0	0	0
75	Clarias gariepinus	F	Adult	0	0	0
76	Clarias gariepinus	F	Adult	0	0	0
77	Clarias gariepinus	F	Adult	0	0	0
78	Clarias gariepinus	F	Adult	0	0	0
79	Clarias gariepinus	F	Adult	0	0	0.02
80	Clarias gariepinus	F	Adult	0	0	0
81	Clarias gariepinus	F	Adult	0	0	0
82	Clarias gariepinus	F	Adult	0	0	0
83	Clarias gariepinus	F	Adult	0	0	0
84	Clarias gariepinus	F	Adult	0	0	0
85	Clarias gariepinus	F	Adult	0	0	0
86	Clarias gariepinus	F	Adult	0	0	0.12
87	Clarias gariepinus	F	Adult	0	0	0
88	Clarias gariepinus	F	Adult	0	0	0
89	Clarias gariepinus	F	Adult	0	0	0.07
90	Clarias gariepinus	F	Adult	0	0	0
91	Clarias gariepinus	F	Adult	0	0	0
92	Clarias gariepinus	F	Adult	0	0	0.02
93	Clarias gariepinus	F	Adult	0	0	0
94	Clarias gariepinus	F	Adult	0	0	0
95	Clarias gariepinus	F	Adult	0	0	0
121	Clarias gariepinus	M	Adult	0	0	0.02
122	clarias gariepinus	M	Adult	0	0	0
123	clarias gariepinus	M	Adult	0	0	0
124	clarias gariepinus	M	Adult	0	0	0
125	clarias gariepinus	M	Adult	0	0	0.07
126	clarias gariepinus	M	Adult	0	0	0
127	clarias gariepinus	M	Adult	0	0	0
128	clarias gariepinus	M	Adult	0	0	0.07
129	clarias gariepinus	M	Adult	0	0	0
130	clarias gariepinus	M	Adult	0	0	0.07
131	clarias gariepinus	M	Adult	0	0	0
132	clarias gariepinus	M	Adult	0	0	0
133	clarias gariepinus	M	Adult	0	0	0.07
134	clarias gariepinus	M	Adult	0	0	0.12
135	clarias gariepinus	M	Adult	0	0	0
136	clarias gariepinus	M	Adult	0	0	0
137	Clarias gariepinus	M	Adult	0	0	0
138	Clarias gariepinus	M	Adult	0	0	0.02
139	Clarias gariepinus	M	Adult	0	0	0
140	Clarias gariepinus	M	Adult	0	0	0
141	Clarias gariepinus	M	Adult	0	0	0.16
142	Clarias gariepinus	M	Adult	0	0	0
143	Clarias gariepinus	M	Adult	0	0	0
144	Clarias gariepinus	M	Adult	0	0	0
145	Clarias gariepinus	M	Adult	0	0	0

## Sheet: Oreo
Sample ID	Species	Sex	Age	Cadmium	Lead	Arsenic
51	oreochromics nilotic	F	young	0	0	0.21
52	oreochromics nilotic	F	young	0	0	0.16
53	oreochromics nilotic	F	young	0	0	0.02
54	oreochromics nilotic	F	young	0	0	0.02
55	oreochromics nilotic	F	young	0	0	0
56	oreochromics nilotic	F	young	0	0	0.12
57	oreochromics nilotic	F	young	0	0	0
58	oreochromics nilotic	F	young	0	0	0
59	oreochromics nilotic	F	young	0	0	0.02
60	oreochromics nilotic	F	young	0	0	0.02
61	oreochromics nilotic	M	young	0	0	0
62	oreochromics nilotic	M	young	0	0	0
63	oreochromics nilotic	M	young	0	0	0.02
64	oreochromics nilotic	M	young	0	0	0.02
65	oreochromics nilotic	M	young	0	0	0.02
66	oreochromics nilotic	M	young	0	0	0.02
67	oreochromics nilotic	M	young	0	0	0
68	oreochromics nilotic	M	young	0	0	0.02
69	oreochromics nilotic	M	young	0	0	0.02
70	oreochromics nilotic	M	young	0	0	0.02
171	oreochromics nilotic	F	Adult	0	0	0
172	oreochromics nilotic	F	Adult	0	0	0.07
173	oreochromics nilotic	F	Adult	0	0	0
174	oreochromics nilotic	F	Adult	0	0	0
175	oreochromics nilotic	F	Adult	0	0	0.02
176	oreochromics nilotic	F	Adult	0	0	0
177	oreochromics nilotic	F	Adult	0	0	0.07
178	oreochromics nilotic	F	Adult	0	0	0
179	oreochromics nilotic	F	Adult	0	0	0.02
180	oreochromics nilotic	F	Adult	0	0	0
181	oreochromics nilotic	M	Adult	0	0	0.07
182	oreochromics nilotic	M	Adult	0	0	0
183	oreochromics nilotic	M	Adult	0	0	0
184	oreochromics nilotic	M	Adult	0	0	0
185	oreochromics nilotic	M	Adult	0	0	0.02
186	oreochromics nilotic	M	Adult	0	0	0
187	oreochromics nilotic	M	Adult	0	0	0
188	oreochromics nilotic	M	Adult	0	0	0
189	oreochromics nilotic	M	Adult	0	0	0.02
190	oreochromics nilotic	M	Adult	0	0	0.07
191	oreochromics nilotic	M	Adult	0	0	0.02
192	oreochromics nilotic	M	Adult	0	0	0.12
193	oreochromics nilotic	M	Adult	0	0	0
194	oreochromics nilotic	M	Adult	0	0	0.02
195	oreochromics nilotic	M	Adult	0	0	0.02
196	oreochromics nilotic	M	Adult	0	0	0
197	oreochromics nilotic	M	Adult	0	0	0
198	oreochromics nilotic	M	Adult	0	0	0
199	oreochromics nilotic	M	Adult	0	0	0
200	oreochromics nilotic	M	Adult	0	0	0.02
				0	0	0.0254
				0	0	0.043669

## Sheet: Syno
Sample ID	Species	Sex	Age	Cadmium	Lead	Arsenic
13	Synodontis membra	F	young	0	0	0
14	Synodontis membra	F	young	0	0	0.22
15	Synodontis membra	F	young	0	0	0
16	Synodontis membra	F	young	0	0	0.16
17	Synodontis membra	F	young	0	0	0
18	Synodontis membra	M	young	0	0	0.07
19	Synodontis membra	M	young	0	0	0
20	Synodontis membra	M	young	0	0	0.02
21	Synodontis membra	M	young	0	0	0
22	Synodontis membra	M	young	0	0	0
96	Synodontis membra	F	Adult	0	0	0
97	Synodontis membra	F	Adult	0	0	0
98	Synodontis membra	F	Adult	0	0	0
99	Synodontis membra	F	Adult	0	0	0
100	Synodontis membra	F	Adult	0	0	0
101	Synodontis membra	F	Adult	0	0	0
102	Synodontis membra	F	Adult	0	0	0
103	Synodontis membra	F	Adult	0	0	0
104	Synodontis membra	F	Adult	0	0	0.02
105	Synodontis membra	F	Adult	0	0	0
106	Synodontis membra	M	Adult	0	0.02	0
107	Synodontis membra	M	Adult	0	0	0.02
108	Synodontis membra	M	Adult	0	0	0
109	Synodontis membra	M	Adult	0	0	0
110	Synodontis membra	M	Adult	0	0	0
111	Synodontis membra	M	Adult	0	0	0
112	Synodontis membra	M	Adult	0	0	0
113	Synodontis membra	M	Adult	0	0	0
114	Synodontis membra	M	Adult	0	0	0
115	Synodontis membra	M	Adult	0	0	0
116	Synodontis membra	M	Adult	0	0	0.02
117	Synodontis membra	M	Adult	0	0	0
118	Synodontis membra	M	Adult	0	0	0
119	Synodontis membra	M	Adult	0	0	0.07
120	Synodontis membra	M	Adult	0	0	0

## Sheet: Lates
Sample ID	Species	Sex	Age	Cadmium	Lead	Arsenic
37	lates niloticus	M	young	0	0	0.07
38	lates niloticus	M	young	0	0	0.012
39	lates niloticus	M	young	0	0	0.07
40	lates niloticus	M	young	0	0	0.07
41	lates niloticus	M	young	0	0	0
42	lates niloticus	M	young	0	0	0.16
43	lates niloticus	M	young	0	0	0.02
44	lates niloticus	F	young	0	0	0.07
45	lates niloticus	F	young	0	0	0
46	lates niloticus	F	young	0	0	0
47	lates niloticus	F	young	0	0	0
48	lates niloticus	F	young	0	0	0.02
49	lates niloticus	F	young	0	0	0
50	lates niloticus	F	young	0	0	0
